# Supplementary material
Source: publisher figshare collection journal article supplement (https://tandf.figshare.com/ndownloader/files/22782710)
Supplement: Supplementary file 1 [file 22782710]

**Supporting Information**

A novel approach for the synthesis of functionalized hydroxylamino derivative of dihydroquinazolinones

Chikkanti Jaganmohan,a,b Vinay Kumar K. P,a R. Venkateshwarlu,a Sandeep Mohanty,a Jaydeep Kumar,a Venkateswara Rao B,b Akula Raghunadh,*a Krishnaji Tadiparthi,*c

*aDr. Reddy’s Laboratories Limited, API plant, Bollaram-III, IDA Bollaram, Medak District, Hyderabad 500049, INDIA*

*bDepartment Organic Chemistry & Chemistry of Foods, Drugs and Water Analysis, Andhra University, Visakhapatnam 500017, A.P., INDIA*

*cDepartment of Chemistry, Christ University, Hosur Road, Bangalore 560029, INDIA*

*e-mail: tkrnmr@gmail.com*

**Table of Contents**

1. **General Information ............................................................................................**S2
2. **Experimental procedures and characterization data........................................**S3
3. **1H and 13C NMR spectra......................................................................................**S13

**General information**

All reactions were carried out in oven or flame-dried glassware under an argon atmosphere employing standard techniques in handling air-sensitive materials. All solvents were reagent grade. All other reagents were used as supplied. Unless otherwise noted, reactions were magnetically stirred and monitored by thin layer chromatography using Merck-Kiesegel 60F plates. Flash chromatography was performed on silica gel (230-400 mesh) using distilled hexane, ethyl acetate, dichloromethane. Flash chromatography was performed with silica gel 60 (particle size 35-70 m) supplied by SDS. Yields refer to chromatographically and spectroscopically pure compounds, unless otherwise noted.

Proton-NMR spectra were recorded using an internal deuterium lock at room temperature in DMSO with internal standard  7.26on a Bruker 400 MHz spectrometer. Proton chemical shifts (δ) are relative to tetramethylsilane (TMS, δ = 0.0) as internal standard and expressed in ppm. Spin multiplicities are given as s (singlet), d (doublet), t (triplet) and m (multiplet) as well as b (broad). Coupling constants (*J*) are given in hertz. Carbon-13 NMR spectra were determined in DMSO solution by using 100 MHz spectrometer and internal standard  77.16was used for DMSO. Melting points were determined using melting point B-540 apparatus and are uncorrected. HRMS was determined using waters LCT premier XETOF ARE-047 apparatus.

**Experimental Procedures and characterization data**

**General procedure for the synthesis of dihydroquinazolinone**: To a stirred solution of isatoic anhydride (0.5 g, 3.1 mmol) in 1,4-Dioxane (15 mL), benzylamine (0.33 g, 3.1 mmol) was added at room temperature and the reaction temperature was slowly increased to 80-90 oC. The reaction mass was stirredfor 3 h and water was added to the reaction mass at room temperature. The reaction mass was extracted with dichloromethane (2 x 20 mL),and separated both the layers.The combined organic layers were dried over anhydrous sodium sulphate and concentrated under reduced pressure to get 2-amino-benzamide.

To a solution of 2-amino-benzamide (250.0 mg, 1.41 mmoles,1.0 eq) in isopropylalcohol (10 mL), *N*-hydroxybenzimidoylchloride (540.0 mg 2.83 mmoles2.0eq), triethylamine (360.0 mg 3.54 mmoles2.5 eq) were addedand the reaction mass was stirred for 2 h.After completion of the reaction,the reaction mass was cooled to 0-5°C and the inorganic material was filtered.Thesolvent in the filtrate wasevaporated under reduced pressure and the crude residue was purified by column chromatography (EtOAc/Pet-Ether (3:7) to get the pure product as a solid.

**General Procedure for the Synthesis of Hydroxybenzimidoyl-chloride:** To the solution of4-chloro-benzaldehyde (1.0 gm 7.11 mmoles1.0 eq) in methanol (10 mL), hydroxylamine hydrochloride (0.5 gm 7.11 mmoles1.0 eq), and K2CO3(0.98 gm 7.11 mmoles1.0 eq) were added and the mixture was stirred at 25-35°C for 4 h.The solvent in the reaction mass was removed under vacuum and water (1 x 15 mL) was added to the crude mass followed by extraction with ethylacetate (2 x 20 mL). The combined organic layers were dried over anhydrous sodium sulphate and the solvent was evaporated underthe reduced pressure to get benzaldoxime (90%).

To a solution of benzaldoxime (0.5 gm 3.2 mmoles1.0 eq) in DMF (2.5 mL), *N*-chloro-succinimide (0.43 gm 3.2 mmoles1.0eq) was added and the mixture was stirred at room temperature for 4 h. Water (1 x 10 mL) was added to the reaction mixture and extracted with ethylacetate (2 x 20 mL).The combined organic layers were dried over anhydrous sodium sulfate andthe solvent was evaporated under reduced pressure to get hydroxybenzimidoyl chloride (550.0 mg, 90%).

**2-(4-Chlorophenyl)-3-cyclopropyl-2-(hydroxyamino)-2,3-dihydroquinazolin-4(1*H*)-one(10a):** Solid; Yield: 70%; 1H NMR (400 MHz, DMSO-d6):δ 10.92 (s, 1H), 10.00 (s, 1H), 8.60 (t, J = 5.6 Hz, 1H),7.52 (dd, J = 7.8, 1.4 Hz, 1H),7.44–7.35 (m, 4H),7.07–7.02 (m, 1H), 6.85– 6.79 (m, 1H),6.15 (d, J = 7.6 Hz, 1H),2.91–2.87 (m, 1H),0.74–0.70 (m, 2H),0.62–0.58 (m, 2H); 13C NMR (400 MHz, DMSO-d6): δ 170.0, 147.3, 140.4 134.0, 131.4, 131.0, 129.1(2C), 129.0(3C), 121.1, 119.4, 119.2, 23.0, 6.0(2C); HRMS (ESI): m/z calcd for C17H16ClN3O2: 330.1004; found: 330.1003.

**2-(4-Chlorophenyl)-2-(hydroxyamino)-3-propyl-2,3-dihydroquinazolin-4(1*H*)-one(10b):** Solid; Yield: 68%; 1H NMR (400 MHz, DMSO-*d*6): δ 10.90 (s, 1H), 9.99 (s, 1H), 8.60 (t, *J* = 5.5 Hz, 1H), 7.55 (dd, *J* = 7.8, 1.4 Hz, 1H), 7.44–7.42 (m, 2H), 7.39–7.36 (m, 2H), 7.10–7.05 (m, 1H), 6.84 (t, *J* = 7.2 Hz, 1H), 6.17 (d, *J* = 7.9 Hz, 1H), 3.26–3.22 (m, 2H), 1.61–1.52 (m, 2H), 0.92 (t, *J* = 7.4 Hz, 3H);13C NMR (400 MHz, DMSO-*d*6): δ 168.8, 147.8, 140.9, 134.2, 131.9, 131.0, 129.6(2C), 129.1(2C), 128.8, 122.0, 120.0, 119.7, 41.3, 22.8, 12.0; HRMS (ESI): *m/z* calcd. for C17H18ClN3O2: 332.1160; found: 332.1192.

**2-(4-Chlorophenyl)-2-(hydroxyamino)-3-isobutyl-2,3-dihydroquinazolin-4(1H)-one(10c):**Solid; Yield: 68%; 1H NMR (400 MHz, DMSO-*d*6):δ 10.87 (s, 1H), 9.92 (s, 1H), 8.61 (t, *J* = 5.7 Hz, 1H), 7.56 (dd, *J* = 7.7 Hz, 1.2 Hz, 1H), 7.44–7.41 (m, 2H), 7.39–7.36 (m, 2H), 7.10– 7.05 (m, 1H), 6.85 (t, *J* = 7.2 Hz, 1H), 6.17 (d, *J* = 8.0 Hz, 1H), 3.11 (t, *J* = 6.4 Hz, 2H), 1.91– 1.84 (m,1H), 0.92 (d, *J* = 6.7 Hz, 6H);13C NMR (400 MHz, DMSO-*d*6): δ 168.3, 147.3, 140.3, 133.7, 131.3, 130.5, 129.0(2C), 128.5(2C), 128.3, 121.8, 119.5, 119.2, 46.4, 28.0, 20.2; HRMS (ESI): *m/z* calcd for C18H20ClN3O2: 346.1317; found: 346.1327.

**2-(4-Chlorophenyl)-2-(hydroxyamino)-3-isopropyl-2,3-dihydroquinazolin-4(1*H*)-one(10d):**Solid; Yield: 68%; 1H NMR (400 MHz, DMSO-*d*6): δ 10.90 (s, 1H), 9.97 (s, 1H), 8.40 (t, *J* = 7.6 Hz, 1H),7.55 (dd, *J* = 8.0, 1.4 Hz, 1H),7.44–7.42 (m, 2H),7.37–7.35(m, 2H),7.06–7.04 (m, 1H),6.85–6.81 (m, 1H),6.16 (d, *J* = 8.0 Hz, 1H),4.14–4.08 (m,1H),1.19 (d, *J*=6.8 Hz, 6H);13C NMR (100 MHz, DMSO-*d*6): δ 167.5, 147.3, 140.4, 133.8, 131.4, 130.5, 129.1(2C), 129.0(3C), 122.0, 119.4, 119.2, 41.0, 22.4(2C); HRMS (ESI): *m/z* calcd for C17H18ClN3O2: 332.1160; found: 332.1165.

**2-(4-Chlorophenyl)-3-cycloheptyl-2-(hydroxyamino)-2,3-dihydroquinazolin-4(1*H*)-one(10e):**Solid; Yield: 69%; 1H NMR (400 MHz, DMSO-*d*6): δ 10.88 (s, 1H), 9.91 (s, 1H), 8.40 (t, *J* = 7.8 Hz, 1H), 7.53 (dd, *J* = 7.7, 1.3 Hz, 1H), 7.44–7.41 (m, 2H), 7.39–7.35 (m, 2H), 7.09– 7.04 (m, 1H), 6.83 (dd, *J* = 11.0, 4.1 Hz, 1H), 6.16 (d, *J* = 8.0 Hz, 1H), 4.01–3.93 (m, 1H), 1.92– 1.84 (m, 2H), 1.68–1.40 (m, 10H); 13C NMR (100 MHz, DMSO-*d*6): δ 167.7, 147.8, 140.8, 134.3, 131.9, 130.9, 129.6(2C), 129.1(2C), 122.5, 120.1, 119.9, 119.7, 50.8, 34.7(2C), 28.2(2C), 24.5(2C); HRMS (ESI): *m/z* calcd for C21H24ClN3O2: 386.1630; found: 386.1636.

**2-(4-Chlorophenyl)-3-(1-cyclohexylethyl)-2-(hydroxyamino)-2,3-dihydroquinazolin-4(1*H*)-one (10f):** Solid; Yield: 67%; 1H NMR (400 MHz, DMSO-*d*6): δ 10.89 (s, 1H), 9.89 (s, 1H), 8.33 (d, *J* = 8.7 Hz, 1H), 7.55 (dd, *J* = 7.7, 1.4 Hz, 1H), 7.45–7.35 (m, 4H), 7.09–7.05 (m, 1H), 6.86– 6.82 (m, 1H), 6.16 (d, *J* = 7.6 Hz, 1H), 3.87 (dt, *J* = 15.2, 7.2 Hz, 1H), 1.79–1.70 (m, 4H), 1.62 (d, *J* = 10.2 Hz, 1H), 1.23–1.10 (m, 6H), 1.03– 0.93(m, 2H), 0.85(dd, *J* = 8.7, 2.1 Hz, 1H); 13C NMR (100 MHz, DMSO-*d*6): δ 168.0, 147.3, 140.3, 134.0, 131.4, 130.4, 129.1 (2C), 128.6 (2C), 128.5, 122.0, 119.4, 119.2, 49.0, 42.4, 29.2, 29.0, 26.0, 25.8(2C), 17.5; HRMS (ESI): *m/z* calcd for C22H26ClN3O2: 400.1786; found: 400.1835.

**2-(4-Chlorophenyl)-2-(hydroxyamino)-3-((*R*)-1-phenylethyl)-2,3-dihydroquinazolin-4(1*H*)-one (10g):** Solid; Yield: 65%;1H NMR (400 MHz, DMSO-*d6*): δ 10.88 (s, 1H), 9.89 (s, 1H), 8.97 (d, *J* = 7.9 Hz, 1H), 7.68 (dd, *J* = 7.8, 1.3 Hz, 1H), 7.45–7.41 (m, 4H), 7.39–7.32 (m, 4H), 7.24 (t, *J* = 7.3 Hz, 1H), 7.12–7.07 (m, 1H), 6.86 (dd, *J* = 10.9, 4.0 Hz, 1H), 6.17 (d, *J* = 8.0 Hz, 1H), 5.17 (dd, *J* = 14.5, 7.2 Hz, 1H), 1.50 (d, *J* = 7.1 Hz, 3H); 13C NMR (100 MHz, DMSO-*d6*): δ 167.5, 147.2, 144.7, 140.5, 133.8, 131.3, 130.7(2C), 129.0(2C), 128.7, 128.5(2C), 128.3 (2C), 126.6, 126.0, 121.2, 119.4, 119.2, 48.4, 22.3; HRMS (ESI): *m/z* calcd for C22H20ClN3O2: 394.1317; found: 394.1378.

**2-(4-Chlorophenyl)-2-(hydroxyamino)-3-((*R*)-1-(naphthalene-1-yl)ethyl)-2,3-dihydroquinazolin-4(1*H*)-one (10h):** Solid; Yield: 62%;1H NMR (400 MHz, DMSO-*d6*): δ 10.87 (s, 1H), 9.83 (s, 1H), 9.16 (d, *J* = 7.7 Hz, 1H), 8.25 (d, *J* = 8.3 Hz, 1H), 7.96 (d, *J* = 7.8 Hz, 1H), 7.85 (d, *J* = 8.2 Hz, 1H), 7.71–7.64 (m, 2H), 7.60–7.50 (m, 4H), 7.45–7.41 (m, 2H), 7.37– 7.35 (m, 1H), 7.12–7.05 (m, 1H), 6.86 (t, *J* = 7.2 Hz, 1H), 6.18 (d, *J* = 8.1 Hz, 1H), 6.02–5.93 (m, 1H), 1.64 (d, *J* = 6.9 Hz, 3H); 13C NMR (100 MHz, DMSO-*d6*): δ 167.5, 147.2, 140.4, 140.2, 133.7, 133.4, 131.3, 130.7, 130.3(2C), 129.0(2C), 128.7(2C), 128.5, 127.2, 126.1, 125.6, 125.5, 123.0, 122.4, 121.4, 119.5, 119.3, 44.7, 21.5; HRMS (ESI): *m/z* calcd for C26H22ClN3O2: 444.1473; found: 444.1516.

**2-(4-Chlorophenyl)-2-(hydroxyamino)-3-((S)-1-(naphthalen-1-yl)ethyl)-2,3-dihydroquinazolin-4(1*H*)-one (10i):** Solid; Yield: 61%;1H NMR (400 MHz, DMSO-*d*6): δ 10.87 (s, 1H), 9.81 (s, 1H), 9.16 (d, *J* = 7.7 Hz, 1H), 8.25 (d, *J* = 8.3 Hz, 1H), 7.96 (d, *J* = 7.8 Hz, 1H), 7.85 (d, *J* = 8.2 Hz, 1H), 7.71–7.65 (m, 2H), 7.63–7.46 (m, 4H), 7.45–7.40 (m, 2H), 7.38-7.34 (m, 1H), 7.12–7.06 (m, 1H), 6.86 (t, *J* = 7.2 Hz, 1H), 6.18 (d, *J* = 8.1 Hz, 1H), 6.02–5.94 (m, 1H), 1.65 (d, *J* = 6.9 Hz, 3H); 13C NMR (100 MHz, DMSO-*d*6): δ 167.5, 147.2, 140.4, 140.2, 133.7, 133.4, 131.3, 130.7(2C), 130.3(2C), 129.0(2C), 128.7, 128.5, 127.2, 126.1, 125.6, 125.5, 123.0, 122.4, 121.4, 119.5, 119.3, 44.7, 21.5; HRMS (ESI): *m/z* calcd for C26H22ClN3O2: 444.1473; found: 444.1461.

**3-Benzhydryl-2-(4-chlorophenyl)-2-(hydroxyamino)-2,3-dihydroquinazolin-4(1*H*)-one (10j):**Solid; Yield: 66%;1H NMR (400 MHz, DMSO-*d*6): δ 10.94 (s, 1H), 9.87 (s, 1H), 9.48 (d, *J* = 8.4 Hz, 1H), 7.73 (dd, *J* = 7.6, 1.2 Hz, 1H), 7.43–7.34 (m, 12H), 7.29–7.25 (m, 2H), 7.10–7.04 (m, 1H), 6.87 (t, *J*=7.6 Hz, 1H), 6.43 (d, *J* = 8.8 Hz, 1H), 6.18 (d, *J* = 8.4 Hz, 1H); 13C NMR (100 MHz, DMSO-*d*6): δ 167.8, 147.3, 142.1, 140.6, 134.0, 131.3, 131.0(2C), 129.1(2C), 129.0(4C), 128.4(4C), 128.3(2C), 127.6, 127.1, 127.0, 121.2, 119.5, 119.3, 56.2 ;HRMS (ESI): m/z calcd for C27H22ClN3O2: 456.1473; found: 456.1520.

**2-(4-Chlorophenyl)-2-(hydroxyamino)-3-(thiophen-3-ylmethyl)-2,3-dihydroquinazolin-4(1H)-one (10k):** Solid; Yield: 69% ;1H NMR (400 MHz, DMSO-*d*6): δ 10.93 (s, 1H), 10.04 (s, 1H), 9.12 (t, *J* = 5.8 Hz, 1H), 7.62 (dd, *J* = 7.8, 1.4 Hz, 1H), 7.50-7.52 (m, 1H), 7.37-7.44 (m, 5H), 7.05-7.14 (m, 2H), 6.82-6.86 (m, 1H), 6.18 (d, *J* = 7.6 Hz, 1H), 4.50 (d, *J* = 6.0 Hz, 2H); 13C NMR (100 MHz, DMSO-*d*6): δ 168.2, 147.2, 141.0, 140.1, 134.0, 131.4, 131.0(2C), 129.1(2C), 129.0, 128.5, 128.0, 127.5, 126.4, 122.0, 121.0, 119.2, 38.1; HRMS (ESI): m/z calcd for C19H16ClN3O2S: 386.0725; found: 386.0722.

**2-(4-Chlorophenyl)-3-(3,4-dimethoxyphenethyl)-2-(hydroxyamino)-2,3-dihydroquinazolin-4(1*H*)-one (10l):** Solid; Yield: 58%;1H NMR (400 MHz, DMSO-*d*6): δ 10.93 (s, 1H), 9.96 (s, 1H), 8.65 (t, *J* = 5.4 Hz, 1H), 7.51 (d, *J* = 6.7 Hz, 1H), 7.43 (d, *J* = 8.6 Hz, 2H), 7.35 (d, *J* = 8.6 Hz, 2H), 7.07 (t, *J* = 7.3 Hz, 1H), 6.88 – 6.81 (m, 4H), 6.16 (d, *J* = 8.1 Hz, 1H), 4.37 (t, *J* = 7.0 Hz, 2H). 3.74 (s, 3H), 3.70 (s, 3H), 2.82 (t, *J* = 7.2 Hz, 2H); 13C NMR (100 MHz, DMSO-*d*6): δ 168.0, 141.0, 140.8, 134.3, 133.9, 131.8, 131.2, 130.8, 129.6, 129.2, 129.1, 127.8, 126.7, 126.1, 126.0, 123.6, 123.0, 122.0, 120.0, 119.8, 45.2, 41.0(2C), 22.0; HRMS (ESI): m/z calcd for C24H24ClN3O2: 454.1528; found: 454.1550.

.

**3-Benzyl-2-(4-chlorophenyl)-2-(hydroxyamino)-2,3-dihydroquinazolin-4(1H)-one(10m):**Solid; Yield: 68%;1H NMR (400 MHz, DMSO-*d*6): δ 10.93 (s, 1H), 10.06 (s, 1H), 9.19 (t, *J* = 6.0 Hz, 1H), 7.61 (dd, *J* = 7.8, 1.4 Hz, 1H), 7.45–7.43 (m, 2H), 7.39–7.33 (m, 6H), 7.28–7.23 (m, 1H), 7.12–7.07 (m, 1H), 6.85–6.81 (m, 1H), 6.19 (d, *J* = 8.2 Hz, 1H), 4.51 (d, *J* = 5.8 Hz, 2H); 13C NMR (100 MHz, DMSO-*d*6): δ 168.4, 147.2, 141.0, 139.5, 134.0, 131.4, 131.1, 131.0(2C), 129.1(2C), 129.0(2C), 128.4, 128.3, 127.2, 127.0, 121.0, 119.5, 119.2, 42.; HRMS (ESI): m/z calcd for C21H18ClN3O2: 380.1160; found: 380.1174.

**2-(4-Chlorophenyl)-3-hexyl-2-(hydroxyamino)-2,3-dihydroquinazolin-4(1*H*)-one (10n):**Solid; Yield: 71%;1H NMR (400 MHz, DMSO-*d*6): δ 10.90 (s, 1H), 9.98 (s, 1H), 8.58 (t, *J* = 5.6 Hz, 1H), 7.55 (dd, *J* = 7.8, 1.4 Hz, 1H), 7.45–7.41 (m, 2H), 7.39–7.35 (m, 2H), 7.10–7.04 (m, 1H), 6.86–6.82 (m, 1H), 6.16 (d, *J*= 7.6 Hz, 1H), 3.30–3.24 (m, 2H), 1.58–1.52 (m, 2H), 1.36– 1.26 (m, 6H), 0.87 (t, *J* = 7.0 Hz, 3H); 13C NMR (100 MHz, DMSO-*d*6): δ 168.7, 147.8, 140.9, 134.3, 131.9, 131.0, 129.6(2C), 129.1(2C), 128.8, 122.1, 120.0, 119.7, 40.6, 31.5, 29.4, 26.6, 22.6, 14.4; HRMS (ESI): m/z calcd for C20H24ClN3O2: 374.1630; found: 374.1666.

**3-Benzyl-2-(hydroxyamino)-2-phenyl-2,3-dihydroquinazolin-4(1*H*)-one (10o):** Solid; Yield: 62%;1H NMR (400 MHz, DMSO-*d*6): δ 10.78 (s, 1H), 10.04(s, 1H), 9.17 (t, *J* = 6.0 Hz, 1H), 7.64 (dd, *J* = 7.8, 1.4 Hz, 1H), 7.38–7.33 (m, 9H), 7.28–7.24 (m, 1H), 7.06–7.02 (m, 1H), 6.84– 6.80 (m, 1H), 6.18 (d, *J* = 7.8 Hz, 1H), 4.51 (d, *J* = 5.9 Hz, 2H); 13C NMR (100 MHz, DMSO-*d*6): δ 168.4, 147.3, 141.0, 139.4, 132.0, 131.5(2C), 131.0(2C), 129.3(2C), 128.4(2C), 128.3, 127.2, 127.0, 122.5, 121.0, 119.5, 119.2, 42.4;HRMS (ESI): m/z calcd for C21H19N3O2 : 346.1550; found: 346.1549.

**3-Benzyl-2-(4-bromophenyl)-2-(hydroxyamino)-2,3-dihydroquinazolin-4(1*H*)-one(10p):** Solid; Yield: 62%;1H NMR (400 MHz, DMSO-*d*6): δ 10.93 (s, 1H), 10.05(s, 1H), 9.18 (t, *J* = 6.0 Hz, 1H), 7.65 (dd, *J* = 7.8, 1.3 Hz, 1H), 7.58–7.55 (m, 2H), 7.38–7.31 (m, 6H), 7.28–7.25 (m, 1H), 7.12–7.08 (m, 1H), 6.86–6.82 (m, 1H), 6.19 (d, *J* = 8.0 Hz, 1H), 4.51 (d, *J* = 5.9 Hz, 2H); 13C NMR (100 MHz, DMSO-*d*6): δ 168.4, 148.1, 141.0, 139.4, 132.5, 130.7, 129.4(2C), 129.2(2C), 128.5(2C), 128.3, 128.0, 127.4, 127.2, 127.0, 121.0, 119.2, 56.0; HRMS (ESI): m/z calcd for C21H18BrN3O2: 424.0665; found: 424.0668.

**2-(4-Chlorophenyl)-2-(hydroxyamino)-3-((*S*)-1-phenylethyl)-2,3-dihydroquinazolin-4(1*H*)-one (10q):** Solid; Yield: 62%;1H NMR (400 MHz, DMSO-*d*6): δ 10.96 (s, 1H), 9.96 (s, 1H), 9.05 (t, *J* = 8.0 Hz, 1H), 7.73 (dd, *J* = 7.6, 1.2 Hz, 1H), 7.48 (d, *J* = 7.0 Hz, 4H), 7.43–7.38 (m, 4H), 7.32–7.28 (m, 1H), 7.18–7.14 (m, 1H), 6.92–6.88 (m, 1H), 6.21 (d, *J* = 8.4 Hz, 1H), 5.23 (dd, *J* = 14.7, 7.3 Hz, 1H ), 1.55 (d, *J*= 7.2 Hz, 3H); 13C NMR (100 MHz, DMSO-*d*6): δ 167.6, 147.2, 144.8, 140.6, 134.0, 131.3, 131.0, 129.1(2C), 128.7, 128.6(2C), 128.3(2C), 127.0(2C), 126.0, 121.2, 119.5, 119.2, 48.4, 22.4 ; HRMS (ESI): m/z calcd for C22H20ClN3O2: 394.1317; found: 394.1431.

**2-(4-Chlorophenyl)-3-cyclopropylquinazolin-4(3*H*)-one (10r):**Solid; Yield: 60%;1H NMR (400 MHz, DMSO-*d*6): δ 8.15 (dd, *J* = 8.0, 1.2 Hz, 1H), 7.85-7.80 (m, 3H), 7.66 (dd, *J* = 8.0, 0.4 Hz, 1H), 7.60–7.52 (m, 3H), 3.24–3.21 (m, 1H), 0.78–0.75 (m, 2H), 0.45–0.42 (m, 2H); 13C NMR (100 MHz, DMSO-*d*6): δ 162.6, 156.0, 147.0, 135.0, 134.3, 130.4(2C), 128.0(2C), 127.1, 127.0, 126.0, 121.0, 30.0, 11.0(2C); HRMS (ESI): m/z calcd for C17H13ClN2O: 297.0809; found: 297.0806.

**1H and 13C NMR spectra of compounds (10a-r)**

**
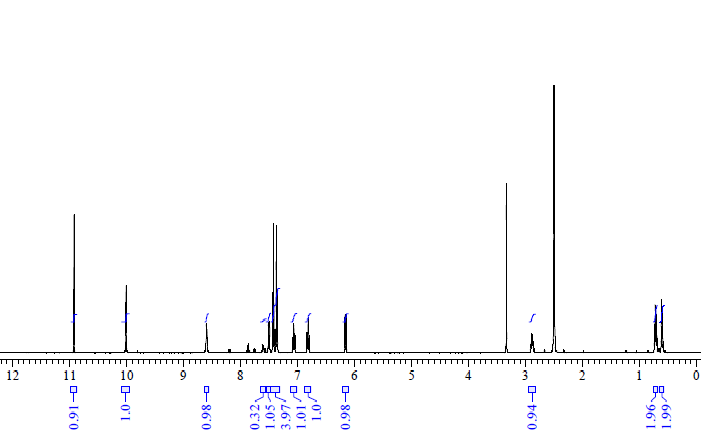
1H NMR (400 MHz, DMSO-***d*6**) spectrum of 10a**

**13C NMR (100 MHz, DMSO- d6) spectrum of 10a .**

**
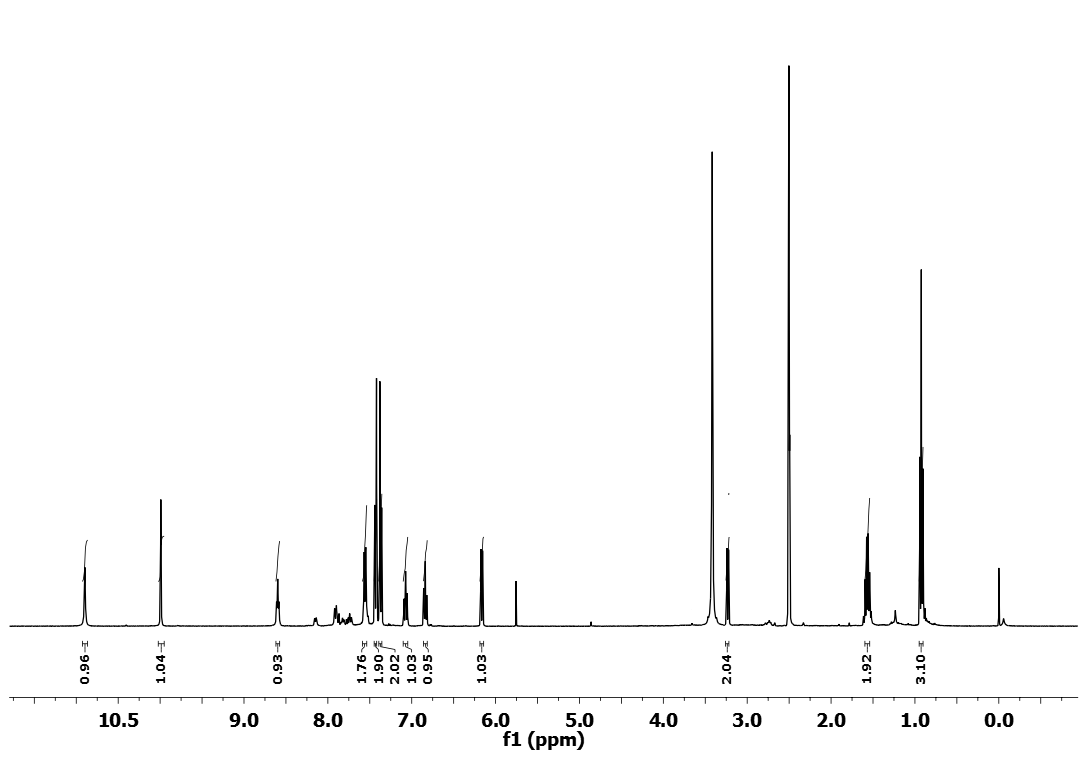
1H NMR (400 MHz, DMSO**-*d*6**) spectrum of 10b**

**13C NMR (100 MHz, DMSO**-*d*6**) spectrum of 10b**

**
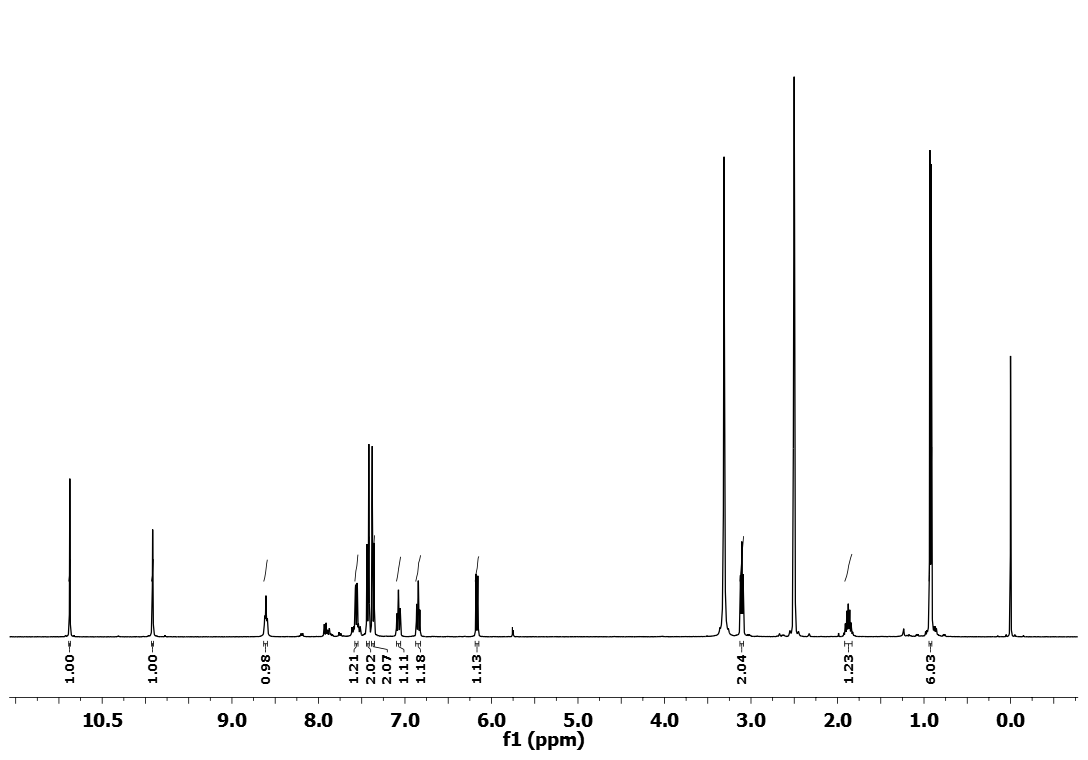
**

**1H NMR (400 MHz, DMSO**-*d*6**) spectrum of 10c**

**13C NMR (100 MHz, DMSO**-*d*6**) spectrum of 10c**

**
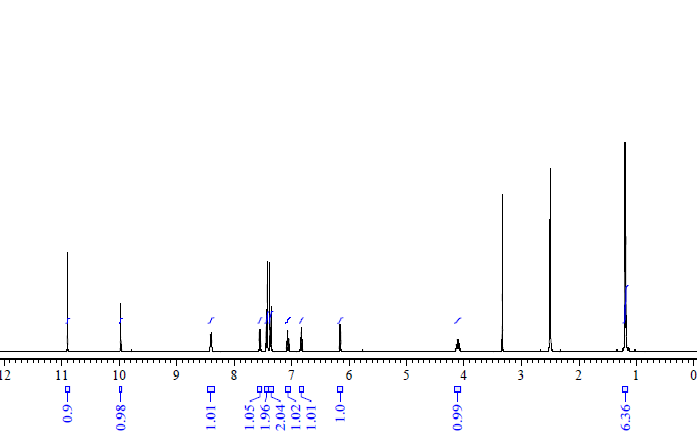
**

**1H NMR (400 MHz, DMSO**-*d*6**) spectrum of 10d**

**13C NMR (100 MHz, DMSO**-*d*6**) spectrum of 10d**

**
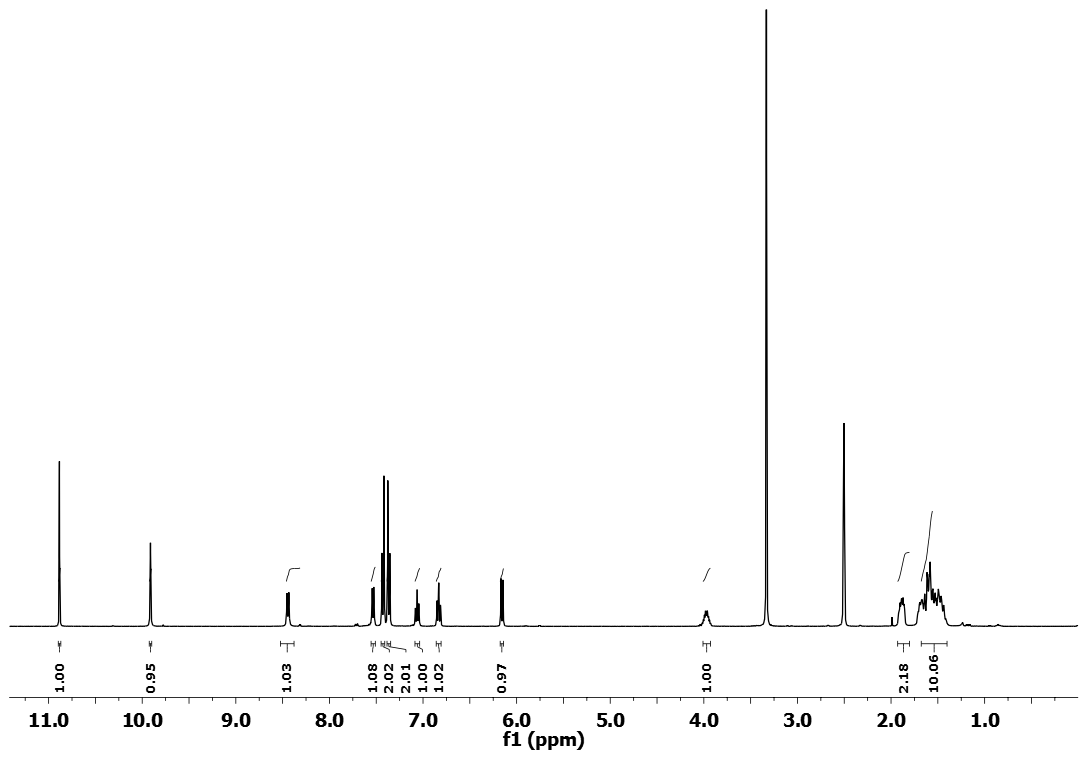
**

**1H NMR (400 MHz, DMSO**-***d*6) spectrum of 10e**

**13C NMR (100 MHz, DMSO**-*d*6**) spectrum of 10e**

**
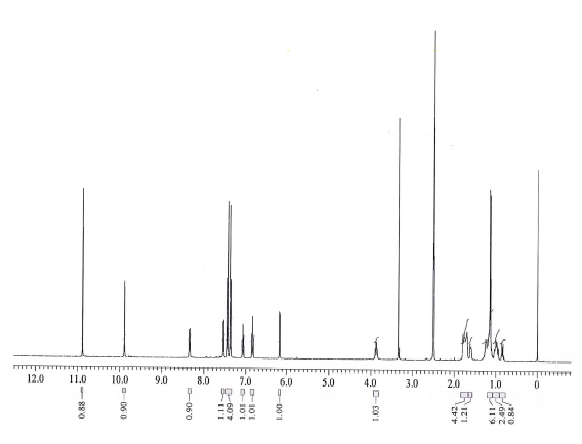
**

**1H NMR (400 MHz, DMSO**-*d*6**) spectrum of 10f**

**13C NMR (100 MHz, DMSO**-*d*6**) spectrum of 10f**

**1H NMR (400 MHz, DMSO**-*d*6**) spectrum of 10g**

**13C NMR (100 MHz, DMSO**-*d*6**) spectrum of 10g**

**
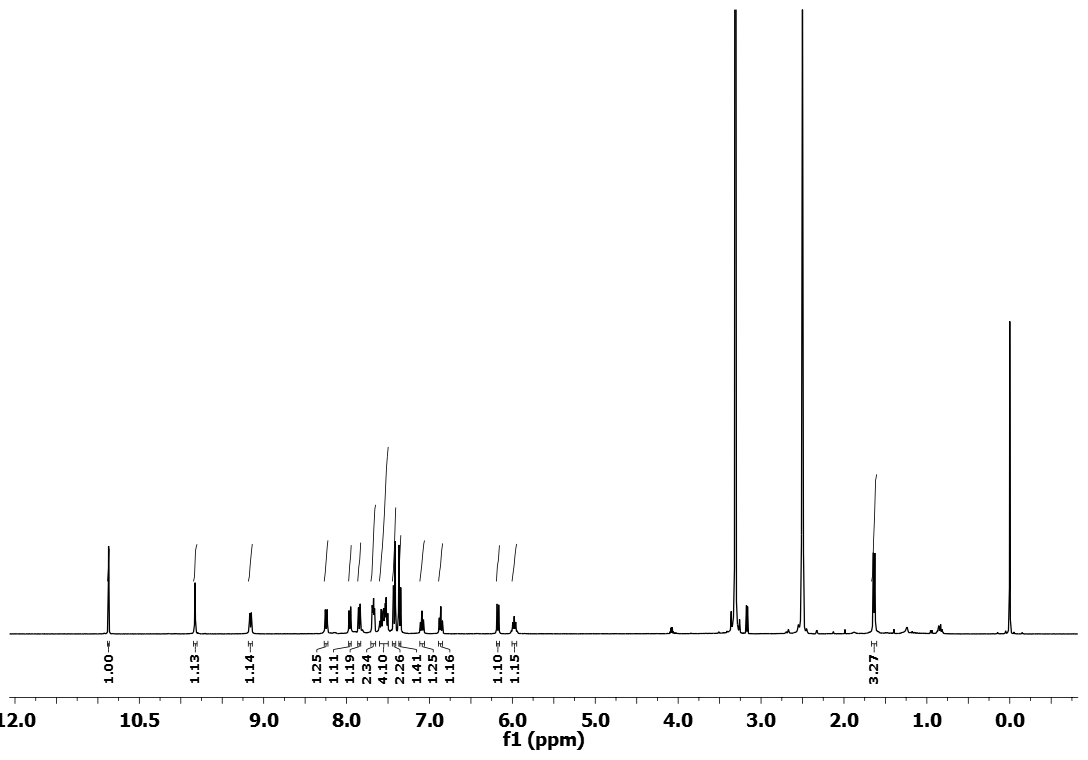
**

**1H NMR (400 MHz, DMSO**-*d*6**) spectrum of 10h**

**13C NMR (100 MHz, DMSO**-*d*6**) spectrum of 10g**

**
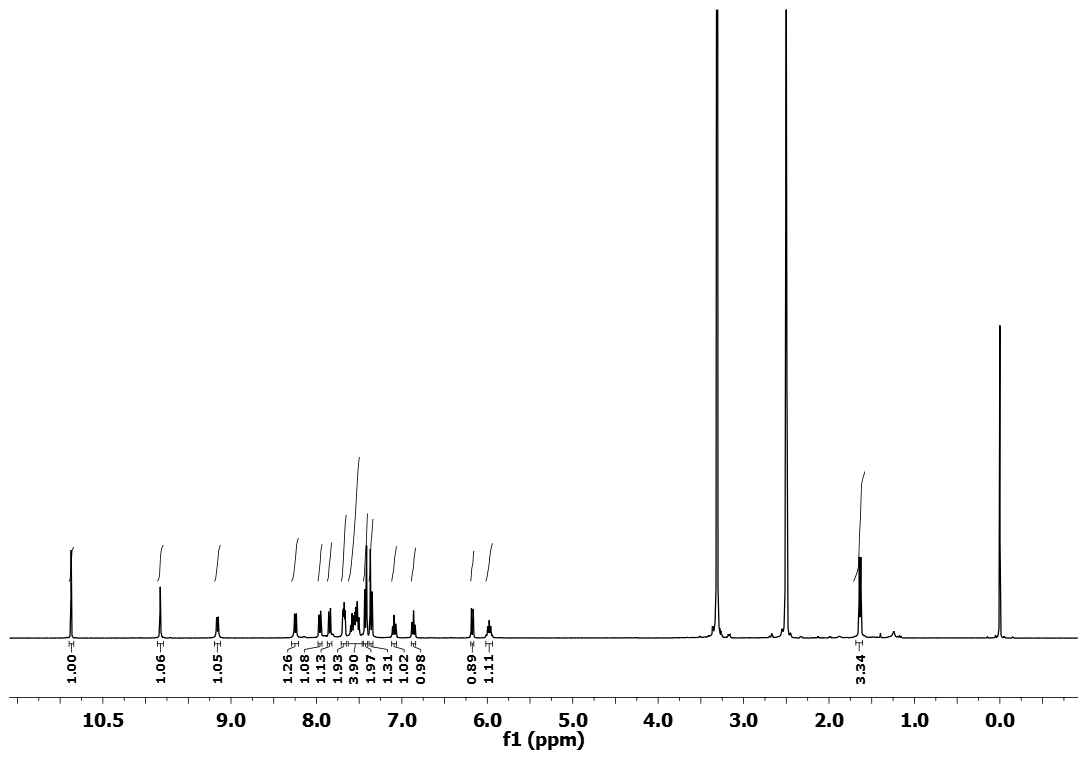
**

**1H NMR (400 MHz, DMSO**-*d*6**) spectrum of 10i**

**13C NMR (100 MHz, DMSO**-*d*6**) spectrum of 10i**

**
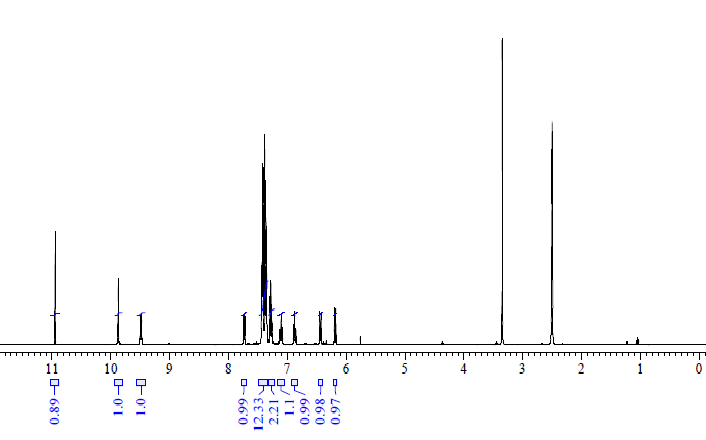
**

**1H NMR (400 MHz, DMSO**-*d*6**) spectrum of 10j**

**13C NMR (100 MHz, DMSO**-*d*6**) spectrum of 10j**

**
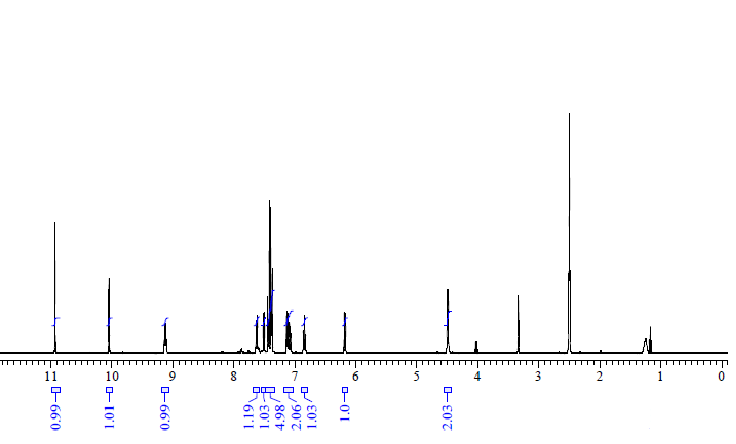
**

**1H NMR (400 MHz, DMSO**-*d*6**) spectrum of 10k**

**
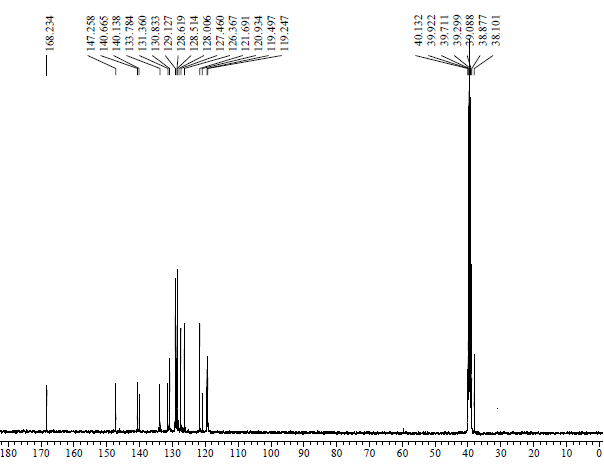
**

**13C NMR (100 MHz, DMSO**-*d*6**) spectrum of 10k**

**
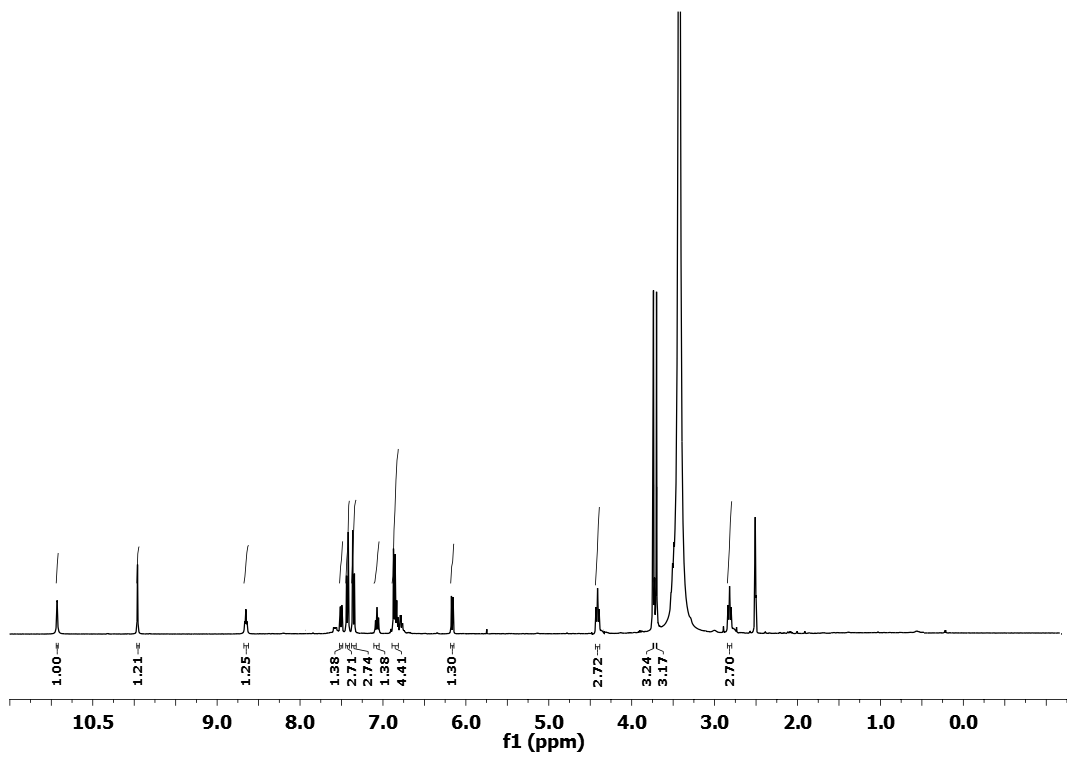
**

**1H NMR (400 MHz, DMSO**-*d*6**) spectrum of 10l**

**13C NMR (100 MHz, DMSO**-*d*6**) spectrum of 10l**

**
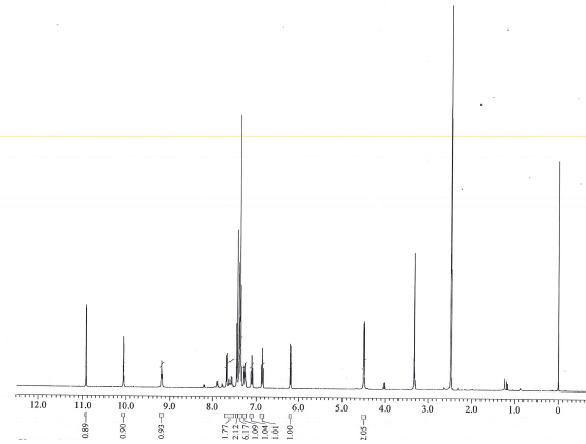
**

**1H NMR (400 MHz, DMSO**-*d*6**) spectrum of 10m**

**13C NMR (100 MHz, DMSO**-*d*6**) spectrum of 10m**

**
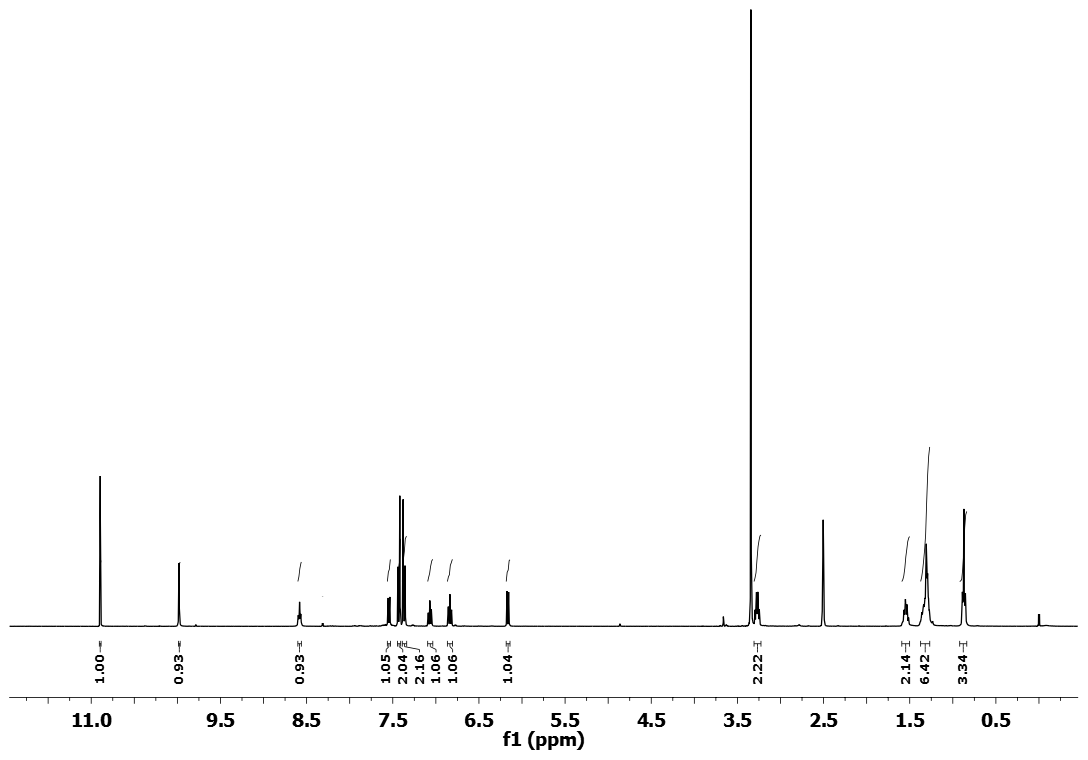
**

**1H NMR (400 MHz, DMSO**-*d*6**) spectrum of 10n**

**13C NMR (100 MHz, DMSO**-*d*6**) spectrum of 10n**

**
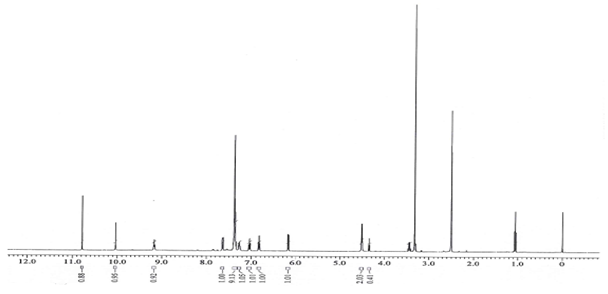
**

**1H NMR (400 MHz, DMSO**-*d*6**) spectrum of 10o**

**13C NMR (100 MHz, DMSO**-*d*6**) spectrum of 10o**

**
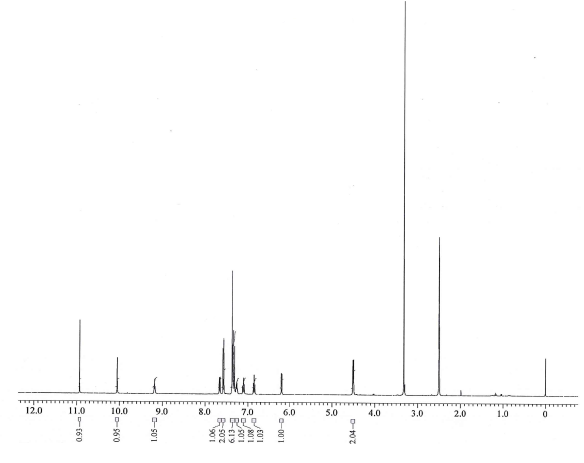
**

**1H NMR (400 MHz, DMSO**-*d*6**) spectrum of 10p**

**
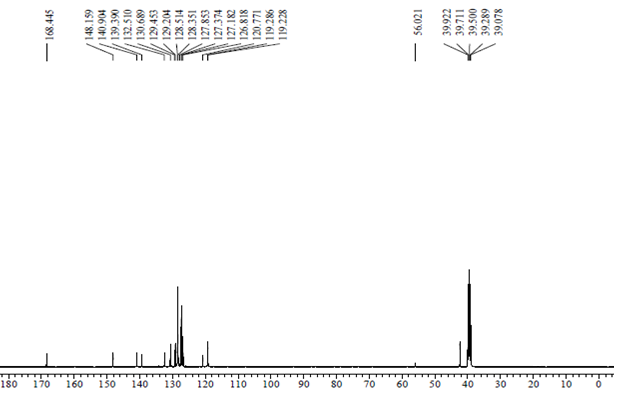
**

**13C NMR (100 MHz, DMSO**-*d*6**) spectrum of 10**

**
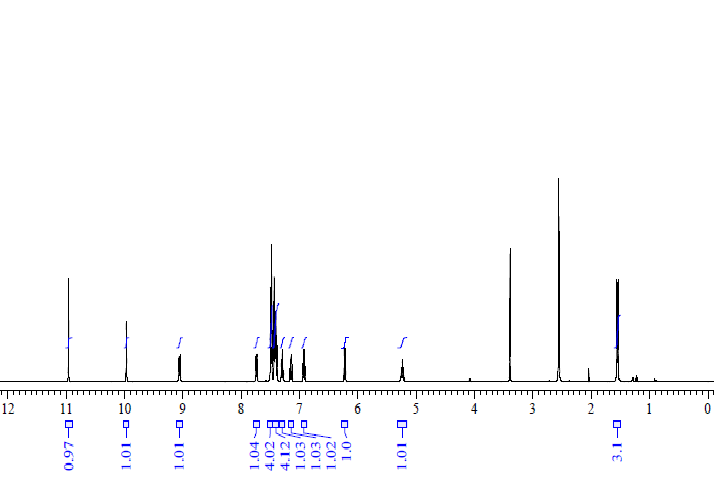
**

**1H NMR (400 MHz, DMSO**-*d*6**) spectrum of 10q**

**
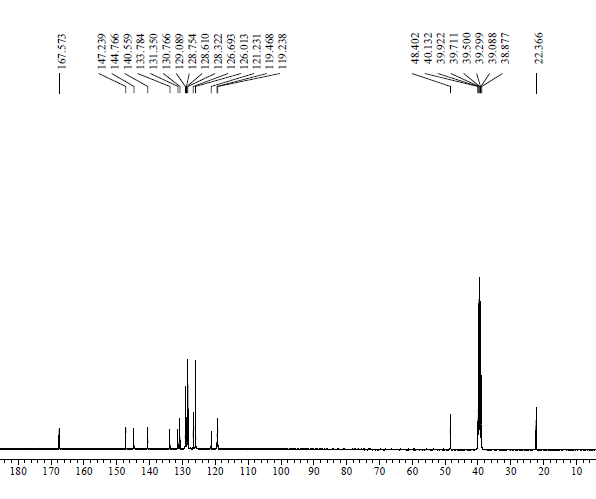
**

**13C NMR (100 MHz, DMSO**-*d*6**) spectrum of 10q**

**
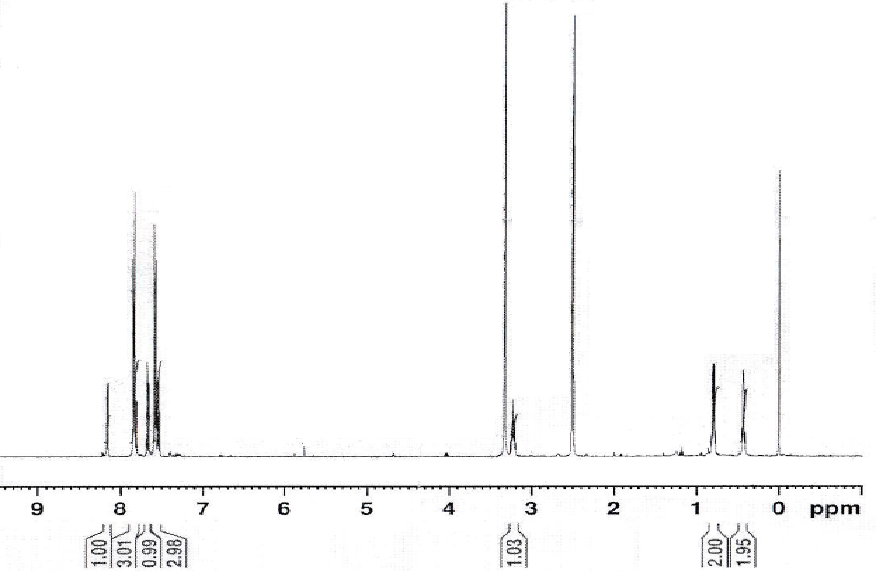
1H NMR (400 MHz, DMSO**-*d*6**) spectrum of 10r**

**13C NMR (100 MHz, DMSO**-*d*6**) spectrum of 10r**
